# Supplementary material
Source: HighWire-hosted journal article supplement (http://www.qdcxjkg.com/highwire/filestream/113743/field_highwire_adjunct_files/0/ERJ_00984-2012_Disclosures.pdf)
Supplement: ERJ_00984-2012_Disclosures.pdf [file ERJ_00984-2012_Disclosures.pdf]

**S.A. Natanek's** salary from 2006 was paid by a GSK grant to fund the inflammation analysis from this study. GSK had no intellectual input into this study. She has received fees from Regeneron/Sanofi Aventis who sponsored her presence on an advisory panel.

**G.S. Marsh's** salary from 2006-2008 was paid by a GSK grant to fund the inflammation analysis from this study. GSK had no intellectual input into this study.

**N.S. Hopkinson** has received consultancy fees from Merck and Danone and support for travel to meets from GSK, Novartis and Boehringer.

**P. Kemp** has received grants from GSK and from Astra Zeneca to fund research including employing individuals in the lab.

**M.I. Polkey** is on the advisory boards of GSK, Astra Zeneca and Novartis, and has received institutional research funds from GSK and Astra Zeneca (used to fund 2 research fellows). He has received support for travel to meetings and consulting fees from GSK, and consulting fees from Novartis, Chiesi and Philips Respironics.
